# Supplementary material for: Synthesis and self-aggregation of zinc chlorophylls possessing an ω-hydroxyalkyl group: effect of distance between interactive hydroxy group and chlorin moiety on aggregationAlternative synthetic approach for 12 and 12D and IR spectra of the precipitates of 3D are available as supplementary data. For direct electronic access see http://www.rsc.org/suppdata/p1/b1/b107902f
Source: Royal Society of Chemistry journal article supplement (doi:10.1039/b107902f), 2001-11-09
Supplement: b107902f.doc [file b107902f.doc]

**Supplementary Data**

**Synthesis and Self-aggregation of Zinc Chlorophylls Possessing -Hydroxyalkyl Group: Effect of Distance Between Interactive Hydroxy Group and Chlorin Moiety on Aggregation**

Shiki Yagaia and Hitoshi Tamiaki*a,b

*a Department of Bioscience and Biotechnology, Faculty of Science and Engineering, Ritsumeikan University, Kusatsu, Shiga, 525-8577, Japan.*

*E-mail: tamiaki@se.ritsumei.ac.jp*

*b "Form and Function" PRESTO, Japan Science and Technology Corporation (JST)*

**Alternative synthetic approach for 12 and 12D**

Smith and his colleagues reported that only the 172-COOCH3 moiety of methyl mesopyropheophorbide-*a* (phytochlorin methyl ester) was reduced to the corresponding primary alcohol by LiAlH4 in diethylether at -78 °C (R. J. Abraham, A. E. Rowan, N. W. Smith and K. M. Smith, *J. Chem. Soc., Perkin Trans. 2*, 1993, 1047). Here, we tried to obtain **3** by the transformation of 32-ester group into the corresponding alcohol with LiAlH4-reduction. Ketal-protected 3-(2-methoxycarbonylethenyl)chlorin **14D** was easily obtained from the Wittig reaction of **8** with Ph3P=CHCOOCH3 according to our reported procedure (to give **13D**, see H. Tamiaki and M. Kouraba, *Tetrahedron*, 1997, **53**, 10677). followed by ketal-protection of the 13-keto group (steps i and ii in Scheme S1). Reaction of **14D** with LiAlH4 in diethylether at -70 °C, followed by ketal-deprotection by an acid (step iii in Scheme A) provided three main isolable fractions in flash column chromatography (FCC) over silica gel. The first fraction was recovery of **13D** (30% yield from **14D**), the second was a mixture of **12D** and **15D** in which 32-COOCH3 or 172-COOCH3 moieties was solely reduced (15% yield from **14D**), and the third was **16D** in which both 32-COOCH3 and 172-COOCH3 moieties were reduced (30% yield from **14D**). The ratio of **12D**:**15D** in the second fraction was 0.08:1 from its 1H-NMR spectrum. This result indicates that the 32-COOCH3 moiety resists LiAlH4-reduction in comparison with the 172-COOCH3 moiety, probably due to the conjugation with the 31–32 double bond. To increase the reactivity of the 32-COOCH3 with LiAlH4, we transformed the 3-(2-methoxycarbonyl)ethenyl group of **13D** into the 3-propionate group. Chlorin **13D** was converted into **13** by catalytic hydrogenation with H2 over PtO2 in 58% yield and successively ketal-protected to give **14**. Reaction of **14** with LiAlH4 followed by ketal-deprotection under the same conditions as in **14D** also gave three FCC fractions composed of **13**, **12**+**15** and **16**, respectively. The ratio of **12**:**15** in the second fraction was increased to 0.76:1, indicating that reduction at the 32-COOCH3 moiety was accelerated by 10-fold in comparison with the case of **14D**. However, successful increase of reactivity of the 32-COOCH3 moiety to LiAlH4 simultaneously gave rise to increase of production of undesired double-reduced chlorin **16** (60% yield from **14**), and a mixture of **12** and **15** was obtained only in 7% yield from **14**. The overall yield from **8** to **12** is 1.1%.

**IR spectrum of the precipitates of 3D**
